# Supplementary material for: Psychometric evaluations of the Theoretical Framework of Acceptability (TFA) among adolescent girls and young women in a low-resource setting
Source: Research Square preprint supplement (doi:10.21203/rs.3.rs-9271781/v1), 2026-04-23
Supplement: Supplementary file 1 [file fd59572a098cc0ee76b6165b.pdf]

**The Likert item questions used to measure acceptability of HIVST using TFA constructs**

| TFA constructs & definitions                                                                                            | Question item                                                                                                                                                                                                                                                                                                                                                                                |                   |          |                |       |                |   |   |   |   |   |
|-------------------------------------------------------------------------------------------------------------------------|----------------------------------------------------------------------------------------------------------------------------------------------------------------------------------------------------------------------------------------------------------------------------------------------------------------------------------------------------------------------------------------------|-------------------|----------|----------------|-------|----------------|---|---|---|---|---|
| <p><b>Affective attitude</b><br/><i>How an individual feels about the intervention</i></p>                              | <p>How much do you agree or disagree that HIV self-testing is a comfortable/good idea for young women like you?</p> <table border="1" data-bbox="662 443 1412 541"> <tr> <td>Strongly disagree</td> <td>Disagree</td> <td>Neutral</td> <td>Agree</td> <td>Strongly agree</td> </tr> <tr> <td>1</td> <td>2</td> <td>3</td> <td>4</td> <td>5</td> </tr> </table>                               | Strongly disagree | Disagree | Neutral        | Agree | Strongly agree | 1 | 2 | 3 | 4 | 5 |
| Strongly disagree                                                                                                       | Disagree                                                                                                                                                                                                                                                                                                                                                                                     | Neutral           | Agree    | Strongly agree |       |                |   |   |   |   |   |
| 1                                                                                                                       | 2                                                                                                                                                                                                                                                                                                                                                                                            | 3                 | 4        | 5              |       |                |   |   |   |   |   |
| <p><b>Burden</b><br/><i>The amount of effort required to participate in the intervention</i></p>                        | <p>How much do you agree or disagree that using HIV self-testing kits seems like an easy process to you?</p> <table border="1" data-bbox="662 756 1412 854"> <tr> <td>Strongly disagree</td> <td>Disagree</td> <td>Neutral</td> <td>Agree</td> <td>Strongly agree</td> </tr> <tr> <td>1</td> <td>2</td> <td>3</td> <td>4</td> <td>5</td> </tr> </table>                                      | Strongly disagree | Disagree | Neutral        | Agree | Strongly agree | 1 | 2 | 3 | 4 | 5 |
| Strongly disagree                                                                                                       | Disagree                                                                                                                                                                                                                                                                                                                                                                                     | Neutral           | Agree    | Strongly agree |       |                |   |   |   |   |   |
| 1                                                                                                                       | 2                                                                                                                                                                                                                                                                                                                                                                                            | 3                 | 4        | 5              |       |                |   |   |   |   |   |
| <p><b>Ethicality</b><br/><i>The extent to which an intervention has good fit with individual's value systems</i></p>    | <p>How much do you agree or disagree that the use of HIV self-testing aligns with your beliefs?</p> <table border="1" data-bbox="662 1056 1412 1155"> <tr> <td>Strongly disagree</td> <td>Disagree</td> <td>Neutral</td> <td>Agree</td> <td>Strongly agree</td> </tr> <tr> <td>1</td> <td>2</td> <td>3</td> <td>4</td> <td>5</td> </tr> </table>                                             | Strongly disagree | Disagree | Neutral        | Agree | Strongly agree | 1 | 2 | 3 | 4 | 5 |
| Strongly disagree                                                                                                       | Disagree                                                                                                                                                                                                                                                                                                                                                                                     | Neutral           | Agree    | Strongly agree |       |                |   |   |   |   |   |
| 1                                                                                                                       | 2                                                                                                                                                                                                                                                                                                                                                                                            | 3                 | 4        | 5              |       |                |   |   |   |   |   |
| <p><b>Perceived effectiveness</b><br/><i>The extent to which the intervention has achieved its intended purpose</i></p> | <p>To what extent do you agree or disagree that HIV self-testing would meaningfully help you to know your HIV status?</p> <table border="1" data-bbox="656 1362 1406 1461"> <tr> <td>Strongly disagree</td> <td>Disagree</td> <td>Neutral</td> <td>Agree</td> <td>Strongly agree</td> </tr> <tr> <td>1</td> <td>2</td> <td>3</td> <td>4</td> <td>5</td> </tr> </table>                       | Strongly disagree | Disagree | Neutral        | Agree | Strongly agree | 1 | 2 | 3 | 4 | 5 |
| Strongly disagree                                                                                                       | Disagree                                                                                                                                                                                                                                                                                                                                                                                     | Neutral           | Agree    | Strongly agree |       |                |   |   |   |   |   |
| 1                                                                                                                       | 2                                                                                                                                                                                                                                                                                                                                                                                            | 3                 | 4        | 5              |       |                |   |   |   |   |   |
| <p><b>Intervention coherence</b><br/><i>The extent to which participants understands how the intervention works</i></p> | <p>To what extent do you agree or disagree that you know HIV self-testing can work for young women like you to be aware of your HIV status?</p> <table border="1" data-bbox="662 1669 1412 1768"> <tr> <td>Strongly disagree</td> <td>Disagree</td> <td>Neutral</td> <td>Agree</td> <td>Strongly agree</td> </tr> <tr> <td>1</td> <td>2</td> <td>3</td> <td>4</td> <td>5</td> </tr> </table> | Strongly disagree | Disagree | Neutral        | Agree | Strongly agree | 1 | 2 | 3 | 4 | 5 |
| Strongly disagree                                                                                                       | Disagree                                                                                                                                                                                                                                                                                                                                                                                     | Neutral           | Agree    | Strongly agree |       |                |   |   |   |   |   |
| 1                                                                                                                       | 2                                                                                                                                                                                                                                                                                                                                                                                            | 3                 | 4        | 5              |       |                |   |   |   |   |   |

|                                                                                                                                                      |                                                                                                                                                                                                                                                                                                                                                                                                      |                     |               |                         |               |                         |   |   |   |   |   |
|------------------------------------------------------------------------------------------------------------------------------------------------------|------------------------------------------------------------------------------------------------------------------------------------------------------------------------------------------------------------------------------------------------------------------------------------------------------------------------------------------------------------------------------------------------------|---------------------|---------------|-------------------------|---------------|-------------------------|---|---|---|---|---|
| <p><b>Self-efficacy</b></p> <p><i>The participant's confidence that they can perform behavior(s) required to participate in the intervention</i></p> | <p>How confident are you in your ability to use HIV self-testing properly and interpret the results?</p> <table border="1" data-bbox="636 310 1484 411"> <tr> <td>Extremely confident</td> <td>Confident</td> <td>Neutral</td> <td>Not confident</td> <td>Extremely not confident</td> </tr> <tr> <td>1</td> <td>2</td> <td>3</td> <td>4</td> <td>5</td> </tr> </table>                              | Extremely confident | Confident     | Neutral                 | Not confident | Extremely not confident | 1 | 2 | 3 | 4 | 5 |
| Extremely confident                                                                                                                                  | Confident                                                                                                                                                                                                                                                                                                                                                                                            | Neutral             | Not confident | Extremely not confident |               |                         |   |   |   |   |   |
| 1                                                                                                                                                    | 2                                                                                                                                                                                                                                                                                                                                                                                                    | 3                   | 4             | 5                       |               |                         |   |   |   |   |   |
| <p><b>Opportunity cost</b></p> <p><i>The benefits, profits or values that were given up to engage in the intervention</i></p>                        | <p>To what extent do you agree or disagree that you would give up some of your time, money and other priorities to use the HIV self-testing services?</p> <table border="1" data-bbox="656 655 1406 751"> <tr> <td>Strongly disagree</td> <td>Disagree</td> <td>Neutral</td> <td>Agree</td> <td>Strongly agree</td> </tr> <tr> <td>1</td> <td>2</td> <td>3</td> <td>4</td> <td>5</td> </tr> </table> | Strongly disagree   | Disagree      | Neutral                 | Agree         | Strongly agree          | 1 | 2 | 3 | 4 | 5 |
| Strongly disagree                                                                                                                                    | Disagree                                                                                                                                                                                                                                                                                                                                                                                             | Neutral             | Agree         | Strongly agree          |               |                         |   |   |   |   |   |
| 1                                                                                                                                                    | 2                                                                                                                                                                                                                                                                                                                                                                                                    | 3                   | 4             | 5                       |               |                         |   |   |   |   |   |
